# Supplementary material for: Two divergent haplotypes from a highly heterozygous lychee genome suggest independent domestication events for early and late-maturing cultivars
Source: PubMed Central journal article supplement (PMC8755541; doi:10.1038/s41588-021-00971-3), 2022-01-03
Supplement: 41588_2021_971_MOESM5_ESM.pdf [file 41588_2021_971_MOESM5_ESM.pdf]

**Supplementary Data files.**

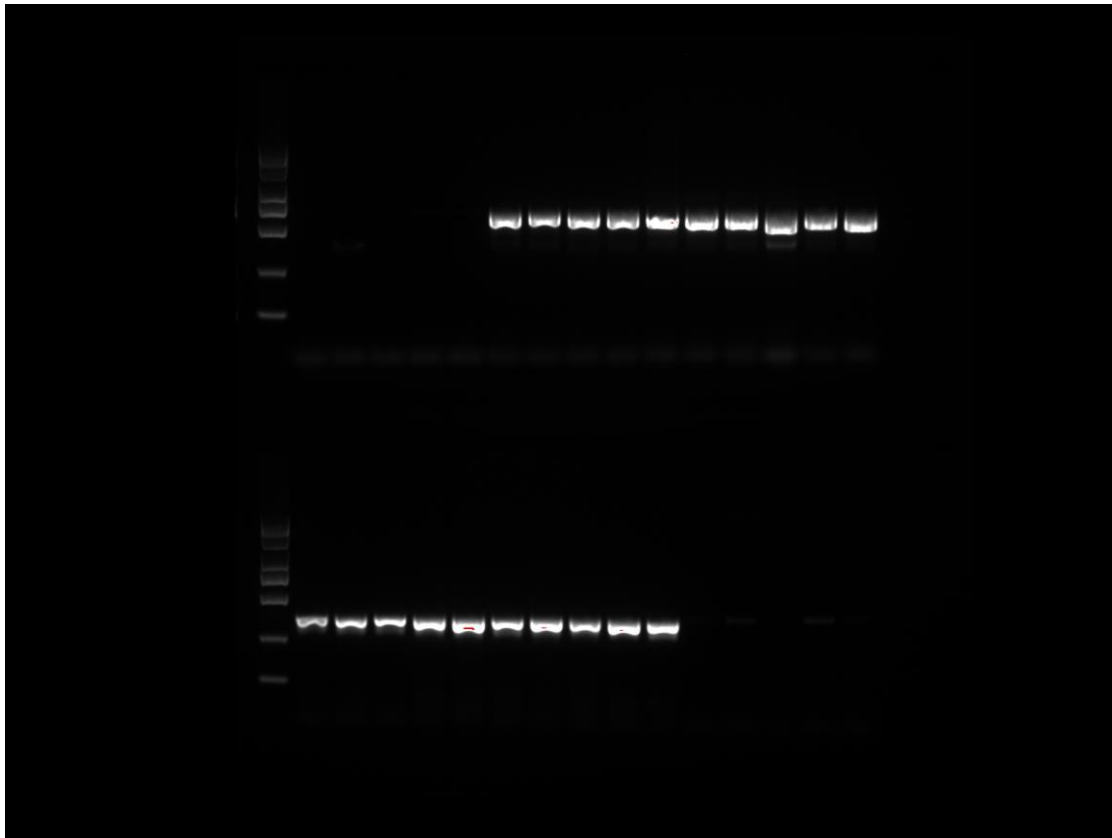

**Source Data Fig. 1 | Uncropped scans of gels for the PCR of 3.7 kb deletion (Fig. 6e). Details in [https://figshare.com/articles/figure/SourceFig1\\_tif/15049242](https://figshare.com/articles/figure/SourceFig1_tif/15049242).**
